# Supplementary material for: Metagenomic Analysis of Blood Virome in Ischemic Stroke Reveals an Increase in Herpesvirus Transcripts and Host Immune Activation
Source: Research Square preprint supplement (doi:10.21203/rs.3.rs-7521090/v1), 2025-09-12
Supplement: Supplementary file 1 [file 3695535606faeb1b61b1fc9a.docx]

# Supplementary Figures


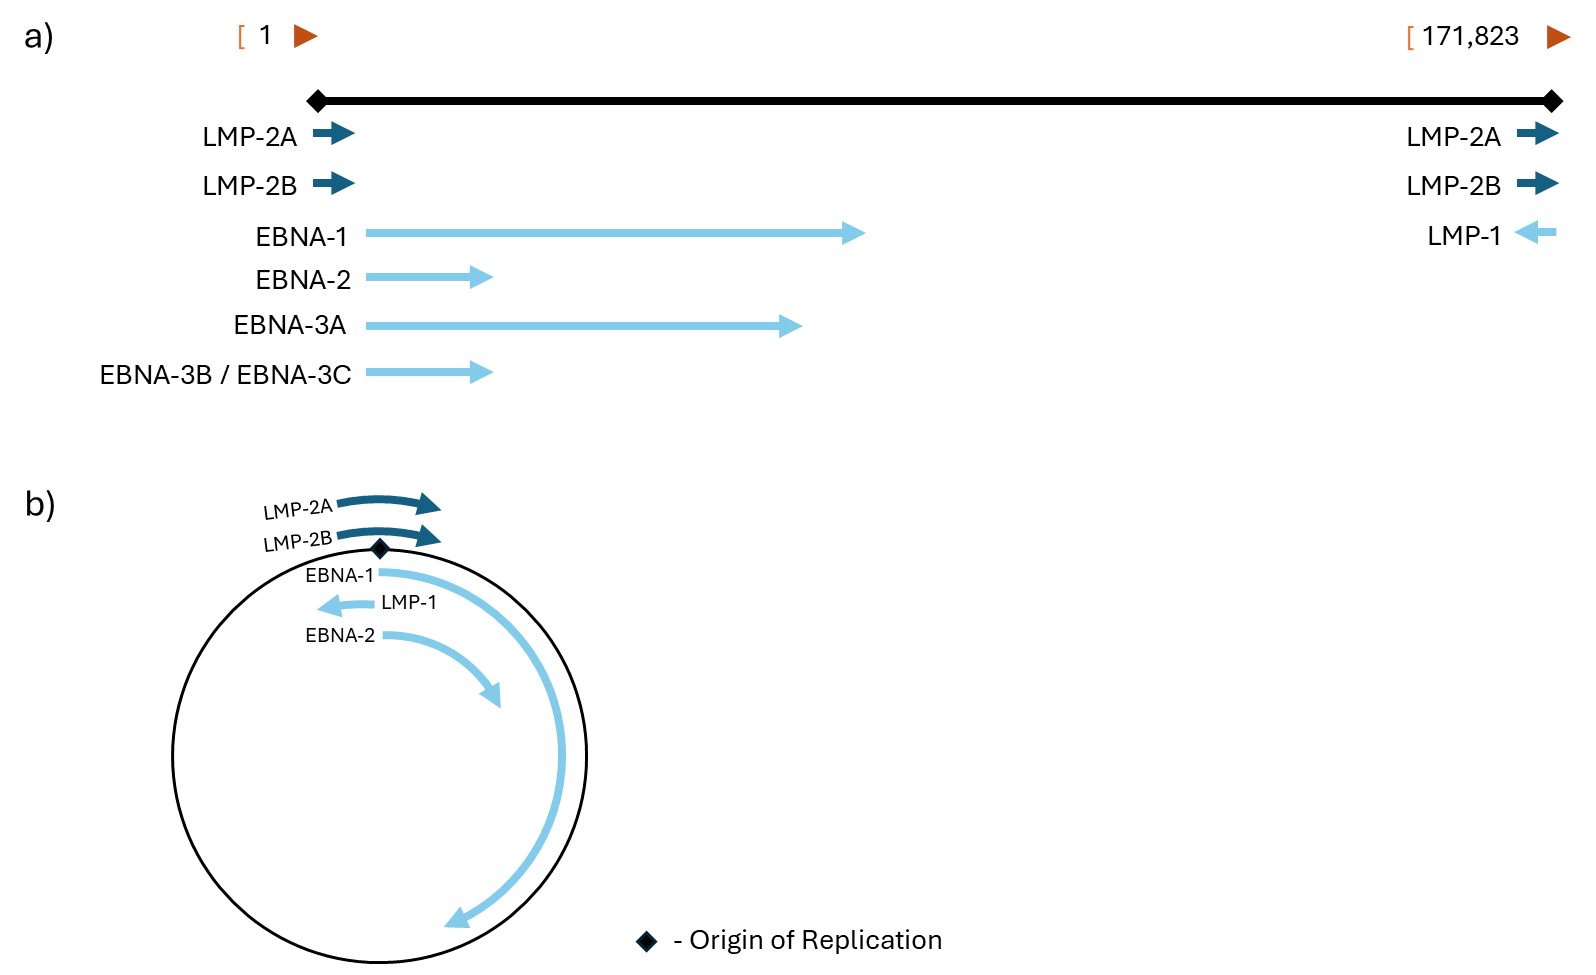


***Supplementary Figure 1.*** *A simplified depiction of the EBV genome. a) linear genomic form, and b) circular episomal form. LMP2A and LMP2B genes cross the origin of replication (denoted by a black diamond). Circularized genome correction is required for use with global alignment tools to avoid rejection of coding sequences which cross the starting base pair, as written in the FASTA sequence file. Data adapted from www.ncbi.nlm.nih.gov.*


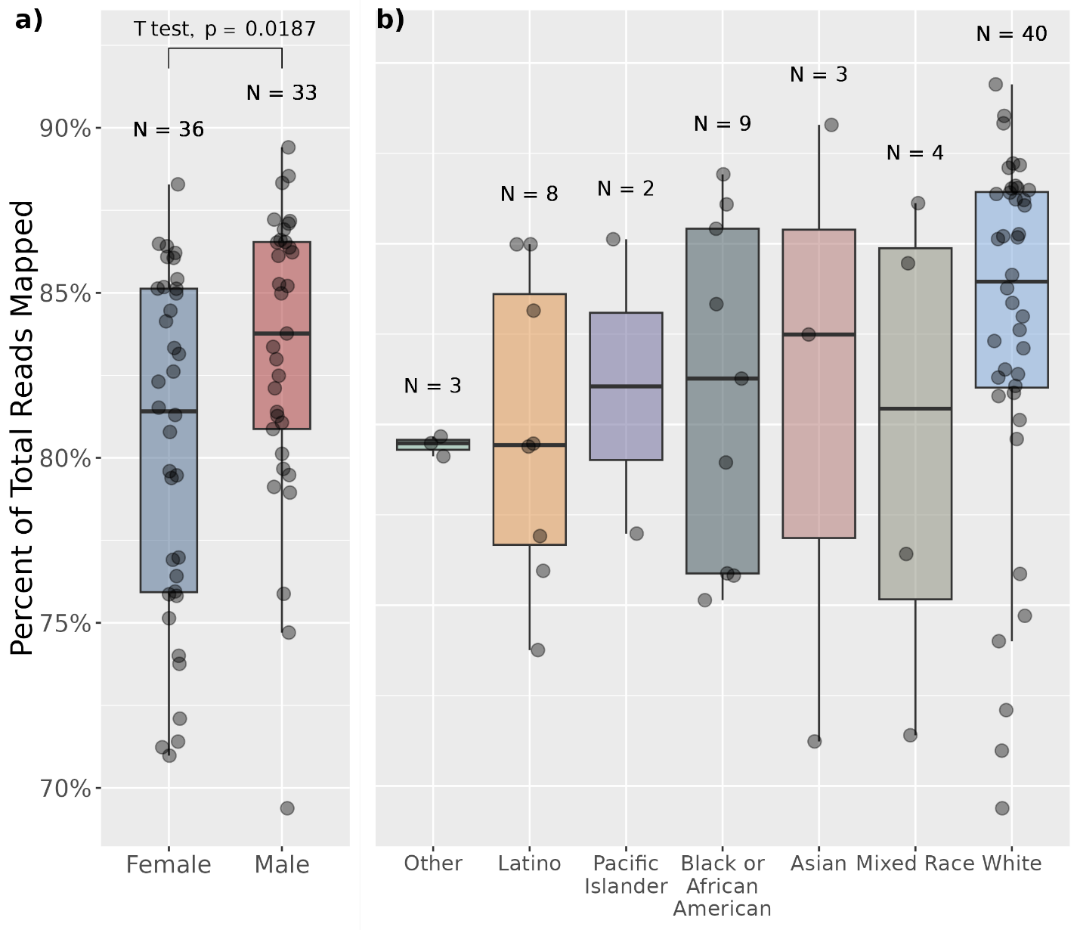


***Supplementary Figure 2.*** *Alignment distribution of total input RNA reads to human reference genome. Comparison is made between a) patient sex and b) patient race using student’s t-test.*


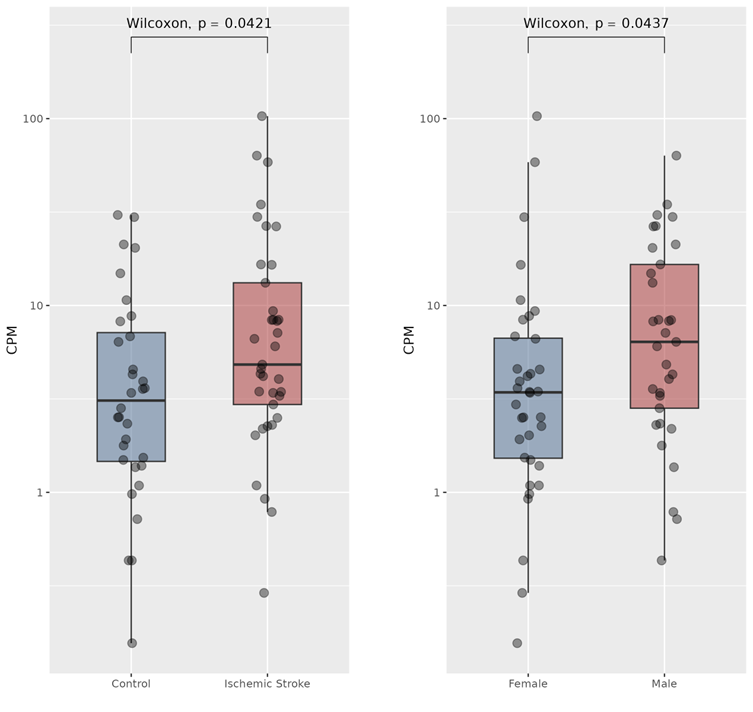


***Supplementary Figure 3.*** *Differences in HHV CPM in females versus males.*


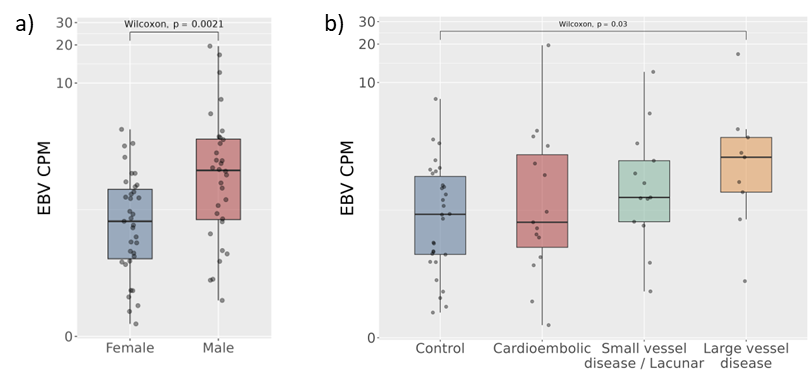


***Supplementary Figure 4.*** *EBV in blood of patients with ischemic stroke and controls. a) Males have higher mean EBV CPM compared to females. b) Stroke due to large vessel atherosclerosis have higher EBV CPM than non-stroke controls.*


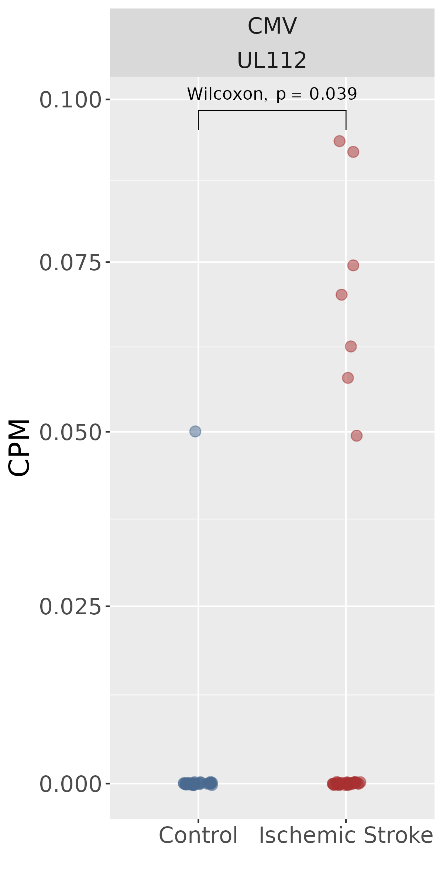


***Supplementary Figure 5.*** *Viral transcript counts in CPM for the CMV gene UL112 between IS and control.*

# Supplementary Tables

***Supplementary Table 1.*** *Complete viral genome database as compiled from the NCBI database of refseq and Genbank sequences.*

| **Family** | **Genus** | **Species** | **Variant Count** | **Gene Count** |
| --- | --- | --- | --- | --- |
| **Adenoviridae** | *Mastadenovirus* | *Human mastadenovirus A* | 4 | 165 |
| **Adenoviridae** | *Mastadenovirus* | *Human mastadenovirus B* | 229 | 10617 |
| **Adenoviridae** | *Mastadenovirus* | *Human mastadenovirus C* | 77 | 3640 |
| **Adenoviridae** | *Mastadenovirus* | *Human mastadenovirus D* | 156 | 6857 |
| **Adenoviridae** | *Mastadenovirus* | *Human mastadenovirus E* | 69 | 3481 |
| **Adenoviridae** | *Mastadenovirus* | *Human mastadenovirus F* | 16 | 571 |
| **Adenoviridae** | *Mastadenovirus* | *Human mastadenovirus G* | 1 | 41 |
| **Anelloviridae** | *Alphatorquevirus* | *Alphatorquevirus cerco7* | 1 | 3 |
| **Anelloviridae** | *Alphatorquevirus* | *Alphatorquevirus homin1* | 19 | 77 |
| **Anelloviridae** | *Alphatorquevirus* | *Alphatorquevirus homin10* | 2 | 12 |
| **Anelloviridae** | *Alphatorquevirus* | *Alphatorquevirus homin2* | 1 | 2 |
| **Anelloviridae** | *Alphatorquevirus* | *Alphatorquevirus homin3* | 1 | 10 |
| **Anelloviridae** | *Alphatorquevirus* | *Alphatorquevirus homin6* | 1 | 6 |
| **Anelloviridae** | *Alphatorquevirus* | *Alphatorquevirus homin7* | 3 | 9 |
| **Anelloviridae** | *Alphatorquevirus* | *Torque teno virus 27* | 1 | 6 |
| **Anelloviridae** | *Betatorquevirus* | *Betatorquevirus homini1* | 1 | 3 |
| **Anelloviridae** | *Betatorquevirus* | *Betatorquevirus homini10* | 23 | 82 |
| **Anelloviridae** | *Betatorquevirus* | *Betatorquevirus homini16* | 1 | 2 |
| **Anelloviridae** | *Betatorquevirus* | *Betatorquevirus homini18* | 1 | 3 |
| **Anelloviridae** | *Betatorquevirus* | *Betatorquevirus homini2* | 1 | 3 |
| **Anelloviridae** | *Betatorquevirus* | *Betatorquevirus homini26* | 1 | 3 |
| **Anelloviridae** | *Betatorquevirus* | *Betatorquevirus homini27* | 1 | 3 |
| **Anelloviridae** | *Betatorquevirus* | *Betatorquevirus homini3* | 1 | 3 |
| **Anelloviridae** | *Betatorquevirus* | *Betatorquevirus homini5* | 1 | 3 |
| **Anelloviridae** | *Betatorquevirus* | *Betatorquevirus homini6* | 1 | 3 |
| **Anelloviridae** | *Betatorquevirus* | *Betatorquevirus homini8* | 1 | 2 |
| **Anelloviridae** | *Betatorquevirus* | *TTV-like mini virus* | 17 | 52 |
| **Anelloviridae** | *Etatorquevirus* | *Etatorquevirus viver3* | 5 | 20 |
| **Anelloviridae** | *Gammatorquevirus* | *Gammatorquevirus homidi1* | 2 | 12 |
| **Anelloviridae** | *Gammatorquevirus* | *Gammatorquevirus homidi10* | 2 | 9 |
| **Anelloviridae** | *Gammatorquevirus* | *Gammatorquevirus homidi11* | 1 | 6 |
| **Anelloviridae** | *Gammatorquevirus* | *Gammatorquevirus homidi12* | 1 | 6 |
| **Anelloviridae** | *Gammatorquevirus* | *Gammatorquevirus homidi13* | 1 | 6 |
| **Anelloviridae** | *Gammatorquevirus* | *Gammatorquevirus homidi14* | 1 | 6 |
| **Anelloviridae** | *Gammatorquevirus* | *Gammatorquevirus homidi2* | 1 | 6 |
| **Anelloviridae** | *Gammatorquevirus* | *Gammatorquevirus homidi5* | 1 | 6 |
| **Anelloviridae** | *Gammatorquevirus* | *Gammatorquevirus homidi6* | 1 | 6 |
| **Anelloviridae** | *Gammatorquevirus* | *Gammatorquevirus homidi7* | 1 | 6 |
| **Anelloviridae** | *Gammatorquevirus* | *Gammatorquevirus homidi8* | 1 | 6 |
| **Anelloviridae** | *Gammatorquevirus* | *Gammatorquevirus homidi9* | 1 | 6 |
| **Anelloviridae** | *Gyrovirus* | *Gyrovirus chickenanemia* | 254 | 759 |
| **Anelloviridae** | *Gyrovirus* | *Gyrovirus galga1* | 27 | 81 |
| **Anelloviridae** | *Gyrovirus* | *Gyrovirus homsa1* | 3 | 9 |
| **Anelloviridae** | *Gyrovirus* | *Gyrovirus homsa2* | 1 | 3 |
| **Anelloviridae** | *Gyrovirus* | *Gyrovirus homsa3* | 5 | 10 |
| **Anelloviridae** | *Gyrovirus* | *Gyrovirus homsa4* | 1 | 3 |
| **Anelloviridae** | *NA* | *Anelloviridae sp.* | 22 | 48 |
| **Anelloviridae** | *NA* | *Small anellovirus* | 2 | 8 |
| **Anelloviridae** | *NA* | *Torque teno virus* | 70 | 219 |
| **Arenaviridae** | *Mammarenavirus* | *Mammarenavirus brazilense* | 2 | 4 |
| **Arenaviridae** | *Mammarenavirus* | *Mammarenavirus choriomeningitidis* | 2 | 4 |
| **Arenaviridae** | *Mammarenavirus* | *Mammarenavirus guanaritoense* | 2 | 4 |
| **Arenaviridae** | *Mammarenavirus* | *Mammarenavirus juninense* | 2 | 4 |
| **Arenaviridae** | *Mammarenavirus* | *Mammarenavirus lujoense* | 2 | 4 |
| **Arenaviridae** | *Mammarenavirus* | *Mammarenavirus machupoense* | 2 | 4 |
| **Astroviridae** | *Mamastrovirus* | *Burkina Faso astrovirus* | 1 | 4 |
| **Astroviridae** | *Mamastrovirus* | *HMO Astrovirus A* | 2 | 7 |
| **Astroviridae** | *Mamastrovirus* | *Mamastrovirus 1* | 49 | 146 |
| **Astroviridae** | *Mamastrovirus* | *Mamastrovirus 3* | 7 | 28 |
| **Astroviridae** | *Mamastrovirus* | *Mamastrovirus 4* | 2 | 8 |
| **Astroviridae** | *Mamastrovirus* | *Mamastrovirus 6* | 7 | 21 |
| **Astroviridae** | *Mamastrovirus* | *Mamastrovirus 9* | 4 | 16 |
| **Astroviridae** | *NA* | *Astrovirus MLB2* | 3 | 9 |
| **Astroviridae** | *NA* | *Astrovirus MLB3* | 1 | 3 |
| **Astroviridae** | *NA* | *Astrovirus VA3* | 1 | 3 |
| **Astroviridae** | *NA* | *Astrovirus VA4* | 1 | 3 |
| **Astroviridae** | *NA* | *Bastrovirus BAS-1* | 1 | 3 |
| **Astroviridae** | *NA* | *Human astrovirus* | 9 | 25 |
| **Bornaviridae** | *Orthobornavirus* | *Orthobornavirus bornaense* | 43 | 293 |
| **Bornaviridae** | *Orthobornavirus* | *Orthobornavirus sciuri* | 25 | 153 |
| **Caliciviridae** | *Norovirus* | *Norwalk virus* | 1330 | 3991 |
| **Caliciviridae** | *Sapovirus* | *Sapporo virus* | 97 | 214 |
| **Caliciviridae** | *Vesivirus* | *Vesicular exanthema of swine virus* | 6 | 17 |
| **Circoviridae** | *Circovirus* | *Circovirus eniyan* | 1 | 2 |
| **Circoviridae** | *Circovirus* | *Circovirus porcine1* | 67 | 140 |
| **Circoviridae** | *Circovirus* | *Circovirus porcine2* | 2916 | 6413 |
| **Circoviridae** | *Circovirus* | *Human circovirus VS6600022* | 1 | 4 |
| **Circoviridae** | *Cyclovirus* | *Cyclovirus bashri* | 1 | 3 |
| **Circoviridae** | *Cyclovirus* | *Cyclovirus homa* | 1 | 2 |
| **Circoviridae** | *Cyclovirus* | *Cyclovirus humana* | 4 | 8 |
| **Circoviridae** | *Cyclovirus* | *Cyclovirus insaan* | 1 | 2 |
| **Circoviridae** | *Cyclovirus* | *Cyclovirus maanav* | 1 | 2 |
| **Circoviridae** | *Cyclovirus* | *Cyclovirus manitan* | 1 | 2 |
| **Circoviridae** | *Cyclovirus* | *Cyclovirus manukha* | 1 | 2 |
| **Circoviridae** | *Cyclovirus* | *Cyclovirus manusyan* | 1 | 3 |
| **Circoviridae** | *Cyclovirus* | *Cyclovirus mmadu* | 1 | 2 |
| **Circoviridae** | *Cyclovirus* | *Cyclovirus munthu* | 1 | 3 |
| **Circoviridae** | *Cyclovirus* | *Cyclovirus mutum* | 1 | 2 |
| **Circoviridae** | *Cyclovirus* | *Cyclovirus nhanloai* | 20 | 60 |
| **Circoviridae** | *NA* | *Circoviridae sp.* | 1 | 2 |
| **Circoviridae** | *NA* | *Human PoSCV5-like circular virus* | 1 | 2 |
| **Circoviridae** | *NA* | *Human fecal virus Jorvi2* | 1 | 5 |
| **Circoviridae** | *NA* | *Human fecal virus Jorvi3* | 1 | 2 |
| **Circoviridae** | *NA* | *Human fecal virus Jorvi4* | 1 | 2 |
| **Coronaviridae** | *Alphacoronavirus* | *Human coronavirus 229E* | 69 | 563 |
| **Coronaviridae** | *Alphacoronavirus* | *Human coronavirus NL63* | 59 | 450 |
| **Coronaviridae** | *Betacoronavirus* | *Betacoronavirus 1* | 326 | 3250 |
| **Coronaviridae** | *Betacoronavirus* | *Human coronavirus HKU1* | 39 | 360 |
| **Coronaviridae** | *Betacoronavirus* | *Middle East respiratory syndrome-related coronavirus* | 612 | 7207 |
| **Coronaviridae** | *Betacoronavirus* | *Severe acute respiratory syndrome-related coronavirus* | 250 | 3571 |
| **Coronaviridae** | *Gammacoronavirus* | *Avian coronavirus* | 423 | 4535 |
| **Flaviviridae** | *Hepacivirus* | *Hepacivirus hominis* | 986 | 1651 |
| **Flaviviridae** | *Hepacivirus* | *Hepacivirus platyrrhini* | 1 | 1 |
| **Flaviviridae** | *Orthoflavivirus* | *Orthoflavivirus aroaense* | 4 | 4 |
| **Flaviviridae** | *Orthoflavivirus* | *Orthoflavivirus denguei* | 4558 | 4558 |
| **Flaviviridae** | *Orthoflavivirus* | *Orthoflavivirus encephalitidis* | 161 | 161 |
| **Flaviviridae** | *Orthoflavivirus* | *Orthoflavivirus flavi* | 238 | 238 |
| **Flaviviridae** | *Orthoflavivirus* | *Orthoflavivirus ilheusense* | 4 | 4 |
| **Flaviviridae** | *Orthoflavivirus* | *Orthoflavivirus japonicum* | 303 | 308 |
| **Flaviviridae** | *Orthoflavivirus* | *Orthoflavivirus kyasanurense* | 25 | 25 |
| **Flaviviridae** | *Orthoflavivirus* | *Orthoflavivirus langatense* | 3 | 3 |
| **Flaviviridae** | *Orthoflavivirus* | *Orthoflavivirus louisense* | 13 | 13 |
| **Flaviviridae** | *Orthoflavivirus* | *Orthoflavivirus loupingi* | 26 | 26 |
| **Flaviviridae** | *Orthoflavivirus* | *Orthoflavivirus murrayense* | 17 | 21 |
| **Flaviviridae** | *Orthoflavivirus* | *Orthoflavivirus nilense* | 1692 | 3510 |
| **Flaviviridae** | *Orthoflavivirus* | *Orthoflavivirus omskense* | 19 | 19 |
| **Flaviviridae** | *Orthoflavivirus* | *Orthoflavivirus powassanense* | 17 | 17 |
| **Flaviviridae** | *Orthoflavivirus* | *Orthoflavivirus tembusu* | 107 | 107 |
| **Flaviviridae** | *Orthoflavivirus* | *Orthoflavivirus usutuense* | 150 | 150 |
| **Flaviviridae** | *Orthoflavivirus* | *Orthoflavivirus wesselsbronense* | 6 | 6 |
| **Flaviviridae** | *Orthoflavivirus* | *Orthoflavivirus zikaense* | 280 | 280 |
| **Flaviviridae** | *Orthoflavivirus* | *Spondweni virus* | 2 | 2 |
| **Flaviviridae** | *Pegivirus* | *Pegivirus columbiaense* | 4 | 4 |
| **Flaviviridae** | *Pegivirus* | *Pegivirus hominis* | 46 | 46 |
| **Flaviviridae** | *Pegivirus* | *Pegivirus platyrrhini* | 17 | 17 |
| **Flaviviridae** | *Pestivirus* | *Pestivirus bovis* | 101 | 101 |
| **Flaviviridae** | *Pestivirus* | *Pestivirus tauri* | 48 | 48 |
| **Genomoviridae** | *Gemycircularvirus* | *Gemycircularvirus HV-GcV1* | 1 | 4 |
| **Genomoviridae** | *Gemycircularvirus* | *Gemycircularvirus sp.* | 5 | 14 |
| **Genomoviridae** | *Gemygorvirus* | *Gemygorvirus sewopo1* | 1 | 4 |
| **Genomoviridae** | *Gemykibivirus* | *Gemykibivirus humas1* | 2 | 8 |
| **Genomoviridae** | *Gemykibivirus* | *Gemykibivirus humas2* | 8 | 25 |
| **Genomoviridae** | *Gemykibivirus* | *Gemykibivirus humas3* | 1 | 3 |
| **Genomoviridae** | *Gemykibivirus* | *Gemykibivirus humas4* | 1 | 4 |
| **Genomoviridae** | *Gemykibivirus* | *Gemykibivirus humas5* | 1 | 3 |
| **Genomoviridae** | *Gemyvongvirus* | *Gemyvongvirus humas1* | 1 | 4 |
| **Hantaviridae** | *Orthohantavirus* | *Hantavirus Z10* | 3 | 3 |
| **Hantaviridae** | *Orthohantavirus* | *Orthohantavirus andesense* | 2 | 2 |
| **Hantaviridae** | *Orthohantavirus* | *Orthohantavirus hantanense* | 3 | 3 |
| **Hantaviridae** | *Orthohantavirus* | *Orthohantavirus sinnombreense* | 1 | 1 |
| **Hantaviridae** | *Orthohantavirus* | *Orthohantavirus tulaense* | 1 | 2 |
| **Hepadnaviridae** | *Orthohepadnavirus* | *Hepatitis B virus* | 9087 | 69026 |
| **Hepeviridae** | *Paslahepevirus* | *Paslahepevirus balayani* | 1 | 3 |
| **Hepeviridae** | *Rocahepevirus* | *Rocahepevirus ratti* | 22 | 83 |
| **Iridoviridae** | *Megalocytivirus* | *Infectious spleen and kidney necrosis virus* | 5 | 611 |
| **Kolmioviridae** | *Deltavirus* | *Hepatitis delta virus* | 451 | 731 |
| **Matonaviridae** | *Rubivirus* | *Rubivirus rubellae* | 84 | 168 |
| **Orthoherpesviridae** | *Cytomegalovirus* | *Cytomegalovirus humanbeta5* | 317 | 59132 |
| **Orthoherpesviridae** | *Lymphocryptovirus* | *Lymphocryptovirus humangamma4* | 301 | 17883 |
| **Orthoherpesviridae** | *Rhadinovirus* | *Rhadinovirus humangamma8* | 13 | 1307 |
| **Orthoherpesviridae** | *Roseolovirus* | *Roseolovirus humanbeta6a* | 3 | 336 |
| **Orthoherpesviridae** | *Roseolovirus* | *Roseolovirus humanbeta6b* | 5 | 492 |
| **Orthoherpesviridae** | *Roseolovirus* | *Roseolovirus humanbeta7* | 1 | 111 |
| **Orthoherpesviridae** | *Simplexvirus* | *Simplexvirus humanalpha1* | 48 | 4045 |
| **Orthoherpesviridae** | *Simplexvirus* | *Simplexvirus humanalpha2* | 13 | 1084 |
| **Orthoherpesviridae** | *Varicellovirus* | *Varicellovirus humanalpha3* | 146 | 10554 |
| **Orthomyxoviridae** | *Alphainfluenzavirus* | *Alphainfluenzavirus influenzae* | 1542 | 2612 |
| **Orthomyxoviridae** | *Betainfluenzavirus* | *Betainfluenzavirus influenzae* | 24 | 36 |
| **Papillomaviridae** | *Alphapapillomavirus* | *Alphapapillomavirus 1* | 27 | 188 |
| **Papillomaviridae** | *Alphapapillomavirus* | *Alphapapillomavirus 10* | 367 | 3292 |
| **Papillomaviridae** | *Alphapapillomavirus* | *Alphapapillomavirus 11* | 42 | 314 |
| **Papillomaviridae** | *Alphapapillomavirus* | *Alphapapillomavirus 13* | 18 | 125 |
| **Papillomaviridae** | *Alphapapillomavirus* | *Alphapapillomavirus 14* | 17 | 119 |
| **Papillomaviridae** | *Alphapapillomavirus* | *Alphapapillomavirus 2* | 2 | 15 |
| **Papillomaviridae** | *Alphapapillomavirus* | *Alphapapillomavirus 3* | 36 | 266 |
| **Papillomaviridae** | *Alphapapillomavirus* | *Alphapapillomavirus 4* | 11 | 75 |
| **Papillomaviridae** | *Alphapapillomavirus* | *Alphapapillomavirus 5* | 85 | 619 |
| **Papillomaviridae** | *Alphapapillomavirus* | *Alphapapillomavirus 6* | 119 | 840 |
| **Papillomaviridae** | *Alphapapillomavirus* | *Alphapapillomavirus 7* | 263 | 2055 |
| **Papillomaviridae** | *Alphapapillomavirus* | *Alphapapillomavirus 8* | 15 | 108 |
| **Papillomaviridae** | *Alphapapillomavirus* | *Alphapapillomavirus 9* | 1406 | 11222 |
| **Papillomaviridae** | *Betapapillomavirus* | *Betapapillomavirus 1* | 11 | 76 |
| **Papillomaviridae** | *Betapapillomavirus* | *Betapapillomavirus 2* | 16 | 111 |
| **Papillomaviridae** | *Betapapillomavirus* | *Betapapillomavirus 3* | 1 | 6 |
| **Papillomaviridae** | *Betapapillomavirus* | *Betapapillomavirus 4* | 3 | 21 |
| **Papillomaviridae** | *Betapapillomavirus* | *Betapapillomavirus 5* | 3 | 20 |
| **Papillomaviridae** | *Gammapapillomavirus* | *Gammapapillomavirus 1* | 2 | 17 |
| **Papillomaviridae** | *Gammapapillomavirus* | *Gammapapillomavirus 10* | 3 | 20 |
| **Papillomaviridae** | *Gammapapillomavirus* | *Gammapapillomavirus 11* | 7 | 48 |
| **Papillomaviridae** | *Gammapapillomavirus* | *Gammapapillomavirus 12* | 9 | 61 |
| **Papillomaviridae** | *Gammapapillomavirus* | *Gammapapillomavirus 13* | 4 | 28 |
| **Papillomaviridae** | *Gammapapillomavirus* | *Gammapapillomavirus 14* | 2 | 14 |
| **Papillomaviridae** | *Gammapapillomavirus* | *Gammapapillomavirus 15* | 7 | 47 |
| **Papillomaviridae** | *Gammapapillomavirus* | *Gammapapillomavirus 16* | 2 | 14 |
| **Papillomaviridae** | *Gammapapillomavirus* | *Gammapapillomavirus 17* | 1 | 7 |
| **Papillomaviridae** | *Gammapapillomavirus* | *Gammapapillomavirus 18* | 4 | 27 |
| **Papillomaviridae** | *Gammapapillomavirus* | *Gammapapillomavirus 19* | 4 | 26 |
| **Papillomaviridae** | *Gammapapillomavirus* | *Gammapapillomavirus 2* | 1 | 7 |
| **Papillomaviridae** | *Gammapapillomavirus* | *Gammapapillomavirus 20* | 2 | 12 |
| **Papillomaviridae** | *Gammapapillomavirus* | *Gammapapillomavirus 21* | 1 | 6 |
| **Papillomaviridae** | *Gammapapillomavirus* | *Gammapapillomavirus 22* | 11 | 77 |
| **Papillomaviridae** | *Gammapapillomavirus* | *Gammapapillomavirus 23* | 3 | 21 |
| **Papillomaviridae** | *Gammapapillomavirus* | *Gammapapillomavirus 24* | 7 | 49 |
| **Papillomaviridae** | *Gammapapillomavirus* | *Gammapapillomavirus 25* | 2 | 13 |
| **Papillomaviridae** | *Gammapapillomavirus* | *Gammapapillomavirus 26* | 1 | 6 |
| **Papillomaviridae** | *Gammapapillomavirus* | *Gammapapillomavirus 27* | 1 | 7 |
| **Papillomaviridae** | *Gammapapillomavirus* | *Gammapapillomavirus 3* | 2 | 13 |
| **Papillomaviridae** | *Gammapapillomavirus* | *Gammapapillomavirus 4* | 1 | 7 |
| **Papillomaviridae** | *Gammapapillomavirus* | *Gammapapillomavirus 5* | 2 | 14 |
| **Papillomaviridae** | *Gammapapillomavirus* | *Gammapapillomavirus 6* | 13 | 73 |
| **Papillomaviridae** | *Gammapapillomavirus* | *Gammapapillomavirus 7* | 11 | 74 |
| **Papillomaviridae** | *Gammapapillomavirus* | *Gammapapillomavirus 8* | 7 | 48 |
| **Papillomaviridae** | *Gammapapillomavirus* | *Gammapapillomavirus 9* | 6 | 42 |
| **Papillomaviridae** | *Gammapapillomavirus* | *Gammapapillomavirus sp.* | 9 | 60 |
| **Papillomaviridae** | *Gammapapillomavirus* | *Human papillomavirus KC5* | 1 | 7 |
| **Papillomaviridae** | *Mupapillomavirus* | *Mupapillomavirus 1* | 1 | 7 |
| **Papillomaviridae** | *Mupapillomavirus* | *Mupapillomavirus 2* | 1 | 7 |
| **Papillomaviridae** | *Mupapillomavirus* | *Mupapillomavirus 3* | 1 | 7 |
| **Papillomaviridae** | *Nupapillomavirus* | *Nupapillomavirus 1* | 1 | 11 |
| **Papillomaviridae** | *NA* | *Human papillomavirus* | 16 | 106 |
| **Papillomaviridae** | *NA* | *Human papillomavirus type 85* | 1 | 8 |
| **Paramyxoviridae** | *Henipavirus* | *Henipavirus hendraense* | 4 | 36 |
| **Paramyxoviridae** | *Henipavirus* | *Henipavirus nipahense* | 6 | 44 |
| **Paramyxoviridae** | *Morbillivirus* | *Morbillivirus caprinae* | 88 | 633 |
| **Paramyxoviridae** | *Morbillivirus* | *Morbillivirus hominis* | 274 | 2025 |
| **Paramyxoviridae** | *Orthorubulavirus* | *Orthorubulavirus hominis* | 27 | 193 |
| **Paramyxoviridae** | *Orthorubulavirus* | *Orthorubulavirus laryngotracheitidis* | 55 | 405 |
| **Paramyxoviridae** | *Orthorubulavirus* | *Orthorubulavirus mammalis* | 13 | 100 |
| **Paramyxoviridae** | *Orthorubulavirus* | *Orthorubulavirus parotitidis* | 620 | 5521 |
| **Paramyxoviridae** | *Pararubulavirus* | *Pararubulavirus sosugaense* | 1 | 7 |
| **Paramyxoviridae** | *Respirovirus* | *Respirovirus laryngotracheitidis* | 43 | 387 |
| **Paramyxoviridae** | *Respirovirus* | *Respirovirus pneumoniae* | 347 | 2721 |
| **Parvoviridae** | *Bocaparvovirus* | *Bocaparvovirus primate1* | 30 | 192 |
| **Parvoviridae** | *Bocaparvovirus* | *Bocaparvovirus primate2* | 16 | 72 |
| **Parvoviridae** | *Dependoparvovirus* | *Adeno-associated virus* | 75 | 652 |
| **Parvoviridae** | *Dependoparvovirus* | *Dependoparvovirus primate1* | 9 | 32 |
| **Parvoviridae** | *Erythroparvovirus* | *Erythroparvovirus primate1* | 18 | 79 |
| **Parvoviridae** | *Erythroparvovirus* | *Human erythrovirus V9* | 1 | 6 |
| **Parvoviridae** | *Tetraparvovirus* | *Tetraparvovirus primate1* | 8 | 20 |
| **Parvoviridae** | *NA* | *Parvovirus NIH-CQV* | 5 | 16 |
| **Peribunyaviridae** | *Orthobunyavirus* | *Orthobunyavirus lacrosseense* | 3 | 4 |
| **Peribunyaviridae** | *Orthobunyavirus* | *Orthobunyavirus oropoucheense* | 2 | 3 |
| **Phenuiviridae** | *Bandavirus* | *Bandavirus dabieense* | 3 | 4 |
| **Phenuiviridae** | *Phlebovirus* | *Phlebovirus candiruense* | 3 | 4 |
| **Phenuiviridae** | *Phlebovirus* | *Phlebovirus riftense* | 3 | 4 |
| **Phenuiviridae** | *Phlebovirus* | *Phlebovirus siciliaense* | 3 | 4 |
| **Picornaviridae** | *Cardiovirus* | *Cardiovirus A* | 32 | 34 |
| **Picornaviridae** | *Cardiovirus* | *Cardiovirus B* | 26 | 33 |
| **Picornaviridae** | *Cardiovirus* | *Cardiovirus D* | 1 | 1 |
| **Picornaviridae** | *Cosavirus* | *Cosavirus A* | 1 | 1 |
| **Picornaviridae** | *Cosavirus* | *Cosavirus B* | 1 | 1 |
| **Picornaviridae** | *Cosavirus* | *Cosavirus D* | 2 | 2 |
| **Picornaviridae** | *Cosavirus* | *Cosavirus E* | 1 | 1 |
| **Picornaviridae** | *Cosavirus* | *Cosavirus F* | 1 | 1 |
| **Picornaviridae** | *Cosavirus* | *Cosavirus JMY-2014* | 1 | 1 |
| **Picornaviridae** | *Cosavirus* | *Human cosavirus* | 2 | 2 |
| **Picornaviridae** | *Enterovirus* | *Enterovirus A* | 2045 | 2045 |
| **Picornaviridae** | *Enterovirus* | *Enterovirus B* | 404 | 404 |
| **Picornaviridae** | *Enterovirus* | *Enterovirus C* | 734 | 734 |
| **Picornaviridae** | *Enterovirus* | *Enterovirus D* | 606 | 606 |
| **Picornaviridae** | *Enterovirus* | *Enterovirus G* | 83 | 83 |
| **Picornaviridae** | *Enterovirus* | *Enterovirus sp.* | 3 | 3 |
| **Picornaviridae** | *Enterovirus* | *Rhinovirus A* | 418 | 418 |
| **Picornaviridae** | *Enterovirus* | *Rhinovirus B* | 84 | 84 |
| **Picornaviridae** | *Enterovirus* | *Rhinovirus C* | 287 | 287 |
| **Picornaviridae** | *Hepatovirus* | *Hepatovirus A* | 98 | 100 |
| **Picornaviridae** | *Kobuvirus* | *Kobuvirus aichi* | 13 | 13 |
| **Picornaviridae** | *Kobuvirus* | *Kobuvirus bejaponia* | 5 | 5 |
| **Picornaviridae** | *Parechovirus* | *Parechovirus A* | 178 | 178 |
| **Picornaviridae** | *Rosavirus* | *Rosavirus A* | 1 | 1 |
| **Picornaviridae** | *Salivirus* | *Salivirus A* | 11 | 11 |
| **Picornaviridae** | *Salivirus* | *Salivirus FHB* | 1 | 1 |
| **Picornaviridae** | *NA* | *Picornaviridae sp.* | 1 | 1 |
| **Pneumoviridae** | *Metapneumovirus* | *Metapneumovirus hominis* | 148 | 1323 |
| **Pneumoviridae** | *Orthopneumovirus* | *Orthopneumovirus bovis* | 8 | 87 |
| **Pneumoviridae** | *Orthopneumovirus* | *Orthopneumovirus hominis* | 2668 | 29074 |
| **Polyomaviridae** | *Alphapolyomavirus* | *Alphapolyomavirus nonihominis* | 5 | 30 |
| **Polyomaviridae** | *Alphapolyomavirus* | *Alphapolyomavirus octihominis* | 24 | 173 |
| **Polyomaviridae** | *Alphapolyomavirus* | *Alphapolyomavirus quardecihominis* | 1 | 6 |
| **Polyomaviridae** | *Alphapolyomavirus* | *Alphapolyomavirus quintihominis* | 52 | 273 |
| **Polyomaviridae** | *Alphapolyomavirus* | *Alphapolyomavirus terdecihominis* | 1 | 9 |
| **Polyomaviridae** | *Betapolyomavirus* | *Betapolyomavirus hominis* | 340 | 2368 |
| **Polyomaviridae** | *Betapolyomavirus* | *Betapolyomavirus macacae* | 35 | 249 |
| **Polyomaviridae** | *Betapolyomavirus* | *Betapolyomavirus quartihominis* | 151 | 907 |
| **Polyomaviridae** | *Betapolyomavirus* | *Betapolyomavirus secuhominis* | 633 | 4425 |
| **Polyomaviridae** | *Betapolyomavirus* | *Betapolyomavirus tertihominis* | 12 | 72 |
| **Polyomaviridae** | *Deltapolyomavirus* | *Deltapolyomavirus decihominis* | 20 | 120 |
| **Polyomaviridae** | *Deltapolyomavirus* | *Deltapolyomavirus septihominis* | 16 | 96 |
| **Polyomaviridae** | *Deltapolyomavirus* | *Deltapolyomavirus sextihominis* | 17 | 101 |
| **Polyomaviridae** | *Deltapolyomavirus* | *Deltapolyomavirus undecihominis* | 7 | 54 |
| **Redondoviridae** | *Torbevirus* | *Vientovirus* | 1 | 3 |
| **Retroviridae** | *Betaretrovirus* | *Mouse mammary tumor virus* | 1 | 8 |
| **Retroviridae** | *Betaretrovirus* | *Simian retrovirus 4* | 5 | 20 |
| **Retroviridae** | *Deltaretrovirus* | *Bovine leukemia virus* | 82 | 984 |
| **Retroviridae** | *Deltaretrovirus* | *Human T-lymphotropic virus 4* | 2 | 16 |
| **Retroviridae** | *Deltaretrovirus* | *Primate T-lymphotropic virus 1* | 165 | 1461 |
| **Retroviridae** | *Deltaretrovirus* | *Primate T-lymphotropic virus 2* | 11 | 80 |
| **Retroviridae** | *Deltaretrovirus* | *Primate T-lymphotropic virus 3* | 7 | 56 |
| **Retroviridae** | *Gammaretrovirus* | *Baboon endogenous virus* | 2 | 5 |
| **Retroviridae** | *Gammaretrovirus* | *Gibbon ape leukemia virus* | 5 | 15 |
| **Retroviridae** | *Gammaretrovirus* | *Murine leukemia virus* | 50 | 150 |
| **Retroviridae** | *Gammaretrovirus* | *Murine leukemia-related retroviruses* | 6 | 17 |
| **Retroviridae** | *Gammaretrovirus* | *Porcine type-C oncovirus* | 3 | 9 |
| **Retroviridae** | *Gammaretrovirus* | *RD114 retrovirus* | 2 | 4 |
| **Retroviridae** | *Lentivirus* | *Human immunodeficiency virus 1* | 4696 | 50092 |
| **Retroviridae** | *Lentivirus* | *Human immunodeficiency virus 2* | 42 | 434 |
| **Retroviridae** | *Lentivirus* | *Simian immunodeficiency virus* | 525 | 5678 |
| **Retroviridae** | *Simiispumavirus* | *Central cimpanzee simian foamy virus* | 1 | 6 |
| **Retroviridae** | *Simiispumavirus* | *Eastern chimpanzee simian foamy virus* | 1 | 5 |
| **Retroviridae** | *Simiispumavirus* | *Guenon simian foamy virus* | 1 | 6 |
| **Retroviridae** | *Spumavirus* | *Simian foamy virus* | 1 | 6 |
| **Retroviridae** | *NA* | *Human endogenous retrovirus K* | 2 | 2 |
| **Sedoreoviridae** | *Orbivirus* | *Great Island virus* | 9 | 10 |
| **Sedoreoviridae** | *Rotavirus* | *Rotavirus A* | 11 | 12 |
| **Sedoreoviridae** | *Rotavirus* | *Rotavirus C* | 1 | 1 |
| **Sedoreoviridae** | *Rotavirus* | *Rotavirus H* | 11 | 11 |
| **Smacoviridae** | *Huchismacovirus* | *Human associated huchismacovirus 1* | 1 | 2 |
| **Smacoviridae** | *Huchismacovirus* | *Human associated huchismacovirus 2* | 1 | 2 |
| **Smacoviridae** | *Huchismacovirus* | *Human associated huchismacovirus 3* | 1 | 2 |
| **Smacoviridae** | *Huchismacovirus* | *Human smacovirus 1* | 13 | 26 |
| **Smacoviridae** | *Inpeasmacovirus* | *Inpeasmacovirus humas1* | 1 | 2 |
| **Smacoviridae** | *Porprismacovirus* | *Porprismacovirus humas3* | 3 | 6 |
| **Smacoviridae** | *Porprismacovirus* | *Porprismacovirus humas4* | 1 | 2 |
| **Spinareoviridae** | *Orthoreovirus* | *Mammalian orthoreovirus* | 10 | 11 |
| **Spinareoviridae** | *Orthoreovirus* | *Pteropine orthoreovirus* | 9 | 9 |
| **Tobaniviridae** | *Torovirus* | *Bovine torovirus* | 6 | 38 |
| **Togaviridae** | *Alphavirus* | *Barmah Forest virus* | 36 | 75 |
| **Togaviridae** | *Alphavirus* | *Chikungunya virus* | 722 | 1819 |
| **Togaviridae** | *Alphavirus* | *Eastern equine encephalitis virus* | 447 | 900 |
| **Togaviridae** | *Alphavirus* | *Madariaga virus* | 32 | 64 |
| **Togaviridae** | *Alphavirus* | *Mayaro virus* | 39 | 104 |
| **Togaviridae** | *Alphavirus* | *Onyong-nyong virus* | 4 | 10 |
| **Togaviridae** | *Alphavirus* | *Ross River virus* | 17 | 42 |
| **Togaviridae** | *Alphavirus* | *Semliki Forest virus* | 9 | 20 |
| **Togaviridae** | *Alphavirus* | *Sindbis virus* | 188 | 520 |
| **Togaviridae** | *Alphavirus* | *Venezuelan equine encephalitis virus* | 123 | 249 |
| **Togaviridae** | *Alphavirus* | *Western equine encephalitis virus* | 35 | 72 |
| **Totiviridae** | *NA* | *Trichomonas vaginalis virus* | 1 | 3 |
| **NA** | *Husavirus* | *Husavirus sp.* | 3 | 3 |
| **NA** | *NA* | *Circo-like virus-Brazil* | 2 | 8 |
| **NA** | *NA* | *Circular ssDNA virus sp.* | 20 | 31 |
| **NA** | *NA* | *Cressdnaviricota sp.* | 2 | 4 |
| **NA** | *NA* | *Hudisavirus sp.* | 7 | 14 |
| **NA** | *NA* | *Human DNA virus* | 1 | 1 |
| **NA** | *NA* | *Human feces pecovirus* | 1 | 2 |
| **NA** | *NA* | *uncultured virus* | 1 | 2 |

***Supplementary Table 2.*** *All viruses detected by RNAseq protocol, including prevalence among the samples, total CPM and mean CPM. * denotes potential source from contamination.*

| **Family** | **Genus** | **Species** | **Prevalence** | **Total CPM** | **Mean CPM** |
| --- | --- | --- | --- | --- | --- |
| **Adenoviridae** | Mastadenovirus | Human mastadenovirus C | 38% | 129.96 | 5 |
| **Flaviviridae** | Pegivirus | Pegivirus hominis | 9% | 0.52 | 0.09 |
| **Flaviviridae** | Pestivirus | * Pestivirus bovis | 86% | 36.06 | 0.61 |
| **Orthoherpesviridae** | Cytomegalovirus | Cytomegalovirus humanbeta5 | 91% | 228.72 | 3.63 |
| **Orthoherpesviridae** | Lymphocryptovirus | Lymphocryptovirus humangamma4 | 97% | 146.76 | 2.19 |
| **Orthoherpesviridae** | Rhadinovirus | Rhadinovirus humangamma8 | 28% | 86.76 | 4.57 |
| **Orthoherpesviridae** | Roseolovirus | Roseolovirus humanbeta6b | 80% | 364.79 | 6.63 |
| **Orthoherpesviridae** | Simplexvirus | Simplexvirus humanalpha1 | 25% | 110.54 | 6.5 |
| **Orthoherpesviridae** | Simplexvirus | Simplexvirus humanalpha2 | 64% | 78.87 | 1.79 |
| **Orthoherpesviridae** | Varicellovirus | Varicellovirus humanalpha3 | 3% | 0.34 | 0.17 |
| **Papillomaviridae** | Alphapapillomavirus | Alphapapillomavirus 3 | 3% | 0.67 | 0.34 |
| **Papillomaviridae** | Alphapapillomavirus | Alphapapillomavirus 5 | 6% | 11.87 | 2.97 |
| **Papillomaviridae** | Betapapillomavirus | Betapapillomavirus 2 | 9% | 1.83 | 0.31 |
| **Papillomaviridae** | Gammapapillomavirus | Gammapapillomavirus 7 | 22% | 1.53 | 0.1 |
| **Pneumoviridae** | Orthopneumovirus | Orthopneumovirus hominis | 29% | 11.54 | 0.58 |
| **Retroviridae** | Gammaretrovirus | * Murine leukemia virus | 3% | 4.31 | 2.16 |
| **Retroviridae** | Lentivirus | * Human immunodeficiency virus 1 | 12% | 2.22 | 0.28 |
| **Retroviridae** | Lentivirus | * Simian immunodeficiency virus | 3% | 33.7 | 16.85 |
| **Retroviridae** | NA | Human endogenous retrovirus K | 67% | 140.74 | 3.06 |
